# Supplementary material for: Anchoring effects of surface chemistry on gold nanorods: modulating autophagy
Source: Royal Society of Chemistry journal article supplement (doi:10.1039/c5tb00076a), 2015-01-01
Supplement: c5tb00076a1.pdf [file c5tb00076a1.pdf]

## SUPPORTING INFORMATION

### **Anchoring Effects of Surface Chemistry on Gold Nanorods: Modulates Autophagy**

Shengliang Li,<sup>#a,b</sup> Chunqiu Zhang,<sup>#a</sup> Weipeng Cao,<sup>a</sup> Benyu Ma,<sup>c</sup> Xiaowei Ma,<sup>a</sup>  
Shubin Jin,<sup>a</sup> Jinchao Zhang,<sup>d</sup> Paul C Wang,<sup>e</sup> Feng Li,<sup>\*b</sup> Xing-Jie Liang<sup>\*a</sup>

<sup>a</sup> CAS Key Laboratory for Biological Effects of Nanomaterials & Nanosafety, National Center for Nanoscience and Technology, No. 11 Beiyitiao, Zhongguancun, Beijing 100190, China. Tel.: +86 10 82545569(O); fax: +86 10 62656765. E-mail: liangxj@nanoctr.cn.

<sup>b</sup> Department of Neurobiology and Anatomy, Zhongshan School of Medicine, Sun Yat-sen University, Guangzhou, China. Tel.: +86 20 87332198; fax: +86 20 82545631. E-mail: lifeng@mail.sysu.edu.cn.

<sup>c</sup> The State Key Laboratory of Biomembrane and Membrane Biotechnology, Tsinghua-Peking Center for Life Sciences, School of Life Sciences, Tsinghua University, Beijing 100084, China

<sup>d</sup> College of Chemistry & Environmental Science, Chemical Biology Key Laboratory of Hebei Province, Hebei University, Baoding, P.R. China

<sup>e</sup> Laboratory of Molecular Imaging, Department of Radiology, Howard University, Washington, D.C. 20060, USA and Fu Jen Catholic University, Taipei 24205, Taiwan.

<sup>#</sup> *These authors contributed equally to this work*

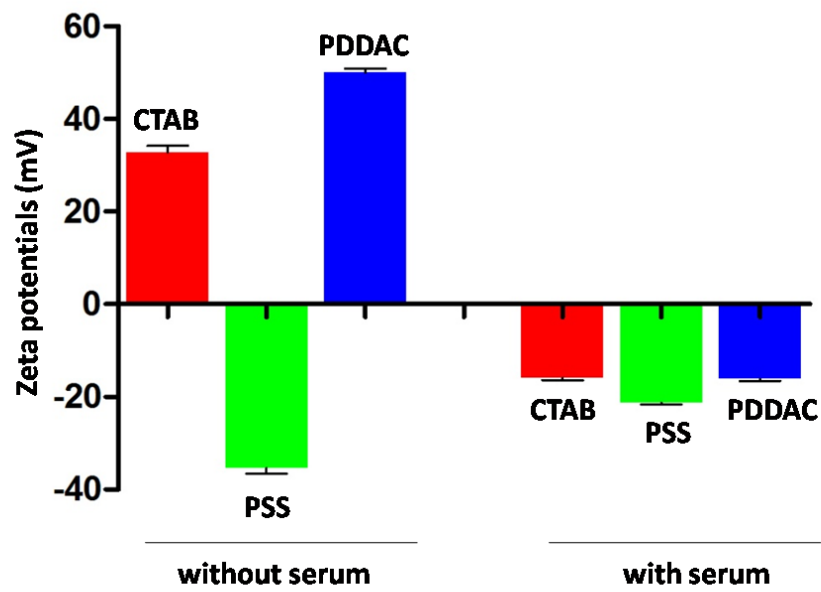

**Figure S1** Zeta potentials of Au NRs after incubation in medium with or without fetal bovine serum for 2 hours.

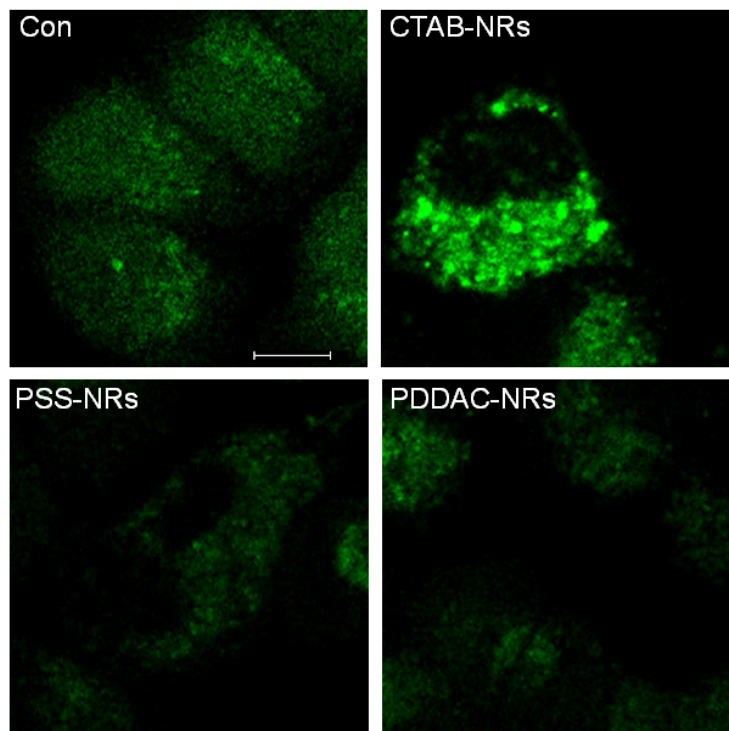

**Figure S2** Confocal microscopy images showing formation of GFP-LC3 dots in GFP-LC3 HeLa cells treated for 4 h with 70 pM of Au NRs with different surface coatings.

Con, control (untreated cells).

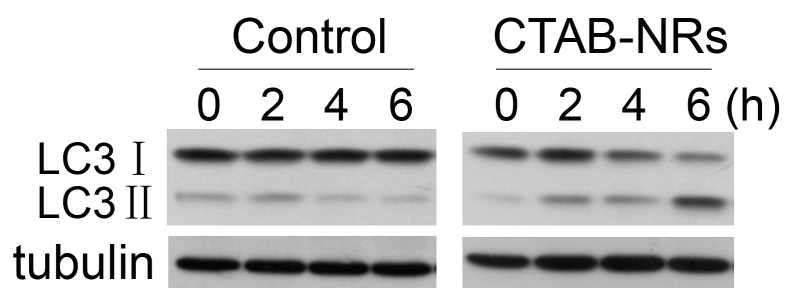

**Figure S3** Western blotting of LC3 in human fetal lung fibroblast (MRC-5) cells that were treated with or without CTAB-coated Au NRs at different times.

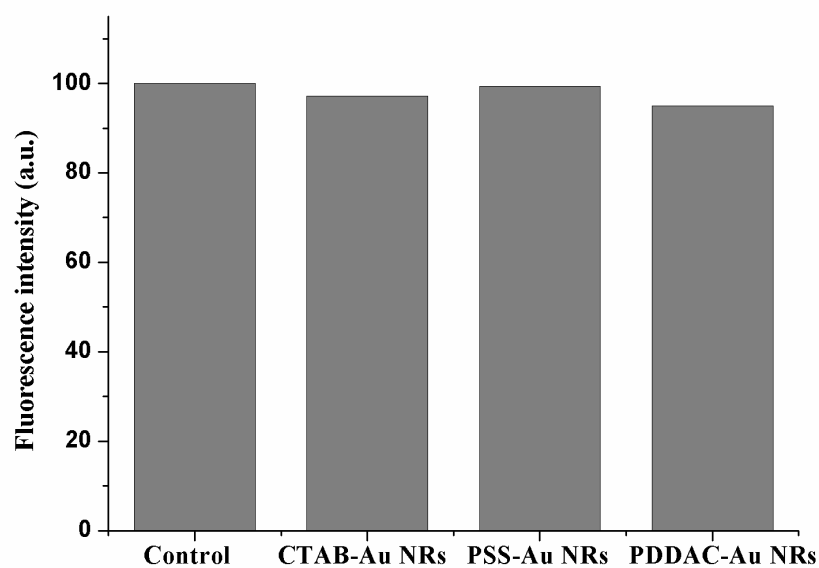

**Figure S4** Statistical analysis of the effect of different surface-coated Au NRs on lysosome pH in Figure 4b.
